# Supplementary material for: Electronic properties of double-atom catalysts for electrocatalytic oxygen evolution reaction in alkaline solution: a DFT study
Source: Royal Society of Chemistry journal article supplement (doi:10.1039/d1nr06334k), 2021-11-19
Supplement: d1nr06334k1.pdf [file d1nr06334k1.pdf]

## Supplementary Information

### Electronic properties of double-atom catalysts for electrocatalytic oxygen evolution reaction in alkaline: A DFT study

Chunhua Yang <sup>a</sup>, Yang Wu <sup>a</sup>, Yuxiu Wang <sup>b</sup>, He-Na Zhang <sup>a</sup>, Liang-Hui Zhu <sup>a</sup>, Xiao-

Chun Wang <sup>a,\*</sup>

<sup>a</sup> *Institute of Atomic and Molecular Physics, Jilin University, Changchun, 130012,*

*P.R. China*

<sup>b</sup> *Department of Ecology and Environment, Yuzhang Normal University, Nanchang,*

*330103, P.R. China*

\* *Corresponding Author. [wangxiaochun@jlu.edu.cn](mailto:wangxiaochun@jlu.edu.cn)*

## Calculation details

### 1. Formation energy ( $E_f$ ), binding energy ( $E_b$ ) and cohesive energy ( $E_{coh}$ )

In order to adopt the optimal coordination configurations of the 2TM embedded in nitrogen-decorative graphene, the formation energy ( $E_f$ ) of 2TM-NG was calculated by using the Eq. s1 [S1,S2]:

$$E_f = E_{2TM-NG} + 10\mu_C - (E_{Gra} + 6\mu_N + \mu_{TM1} + \mu_{TM2}) \quad (\text{Eq. s1})$$

where  $E_{2TM-NG}$  is the total energy of 2TM-NG,  $E_{Gra}$  is the total energy of the pristine  $7 \times 7$  graphene supercell and  $\mu_C$  is the chemical potential of C atom [S3,S4], and  $\mu_N$  is the chemical potential of N atom taken from a  $N_2$  molecule in the gas phase [S5].  $\mu_{TM1}$  and  $\mu_{TM2}$  are the chemical potentials of transition metals (Fe/Co/Ni in its bcc/hcp/fcc bulk structures, respectively) [S6].

In order to prove that the  $N_{PA}G$  and  $N_PG$  can exhibit higher chemical activity and trap 2TM (FeCo, FeNi, CoNi), the binding energy ( $E_b$ ) between the 2TM and the substrate was studied and defined as Eq. s2 [S7]:

$$E_b = E_{2TM-NG} - E_{NG} - E_{TM1} - E_{TM2} \quad (\text{Eq. s2})$$

where  $E_{2TM-NG}$  and  $E_{NG}$  represent the total energy of 2TM-NG and NG, respectively.  $E_{TM1}$  and  $E_{TM2}$  is the electronic energy of isolated transition metal atom (Fe, Co or Ni), and a lattice constant of  $17.15 \text{ \AA} \times 17.15 \text{ \AA} \times 18.00 \text{ \AA}$  was used for this computation.

Due to the large cohesive energy ( $E_{coh}$ ) of TM bulk, the feasibility of atomically dispersed 2TM-NG catalysts need to be further assessed [S8].

$$E_{coh} = E_{bulk} / n - E_{TM} \quad (\text{Eq. s3})$$

where  $E_{bulk}$  is the energy of TM bulk,  $n$  is the number of atoms in the bulk,  $E_{TM}$  is the energy of free TM.

### 2. Gibbs free energy

The four elementary steps for OER process under alkaline conditions are shown in Eq (1-4). The Gibbs free energies  $\Delta G_{OH^*}$ ,  $\Delta G_{O^*}$  and  $\Delta G_{OOH^*}$ , which correspond to  $OH^*$ ,  $O^*$  and  $OOH^*$  adsorption on the electrocatalyst models, were calculated according to Eq. s4 [S9]:

$$\Delta G_{\text{ads}} = \Delta E_{\text{ads}} + \Delta E_{\text{ZPE}} - T\Delta S_{\text{ads}} - \Delta G_{\text{U}} \quad (\text{Eq. s4})$$

where  $\Delta E_{\text{ads}}$  is the electronic adsorption energy,  $\Delta E_{\text{ZPE}}$  is the zero-energy calculated from the vibrational frequencies,  $\Delta S_{\text{ads}}$  is the entropy change, and  $T$  is the system temperature (298.15 K).  $\Delta G_{\text{U}} = neU$ , where  $n$  is the number of transferred electrons,  $e$  is the elementary charge, and  $U$  is the electrode potential referenced to computational hydrogen electrode (CHE) model. At equilibrium potential  $U_0$ , some of the OER steps become uphill and an applied potential  $U$  is needed to surmount the positive free energy change. Thus, the over-potential is determined as  $\eta = U - U_0$ .

The free energy of  $\text{H}_2\text{O}(l)$  derived as  $G_{\text{H}_2\text{O}(l)} = G_{\text{H}_2\text{O}(g)} + RT\ln(p/p_0)$  since only  $G_{\text{H}_2\text{O}(g)}$  can be directly obtained by DFT calculations, where  $R$  is the ideal gas constant,  $T = 298.15$  K,  $p = 0.035$  bar, and  $p_0 = 1$  bar. The free energy of  $\text{OH}^-$  was derived as  $G_{\text{OH}^-} = G_{\text{H}_2\text{O}(l)} - G_{\text{H}^+}$ , where  $G_{\text{H}^+} = 1/2G_{\text{H}_2} - k_{\text{B}}T\ln 10 \times \text{pH}$  ( $k_{\text{B}}$  is Boltzmann's constant). Hence, the equilibrium potential  $U_0$  for OER at  $\text{pH} = 14$  was determined to be 0.402 V vs NHE according to the Nernst equation, where the reactant and product are at the same energy level [S10].

Since it is difficult to obtain the exact free energy of OH, O and OOH radicals in the electrolyte solution, the Gibbs free energies  $\Delta G_{\text{OH}^*}$ ,  $\Delta G_{\text{O}^*}$  and  $\Delta G_{\text{OOH}^*}$  are defined as Eq. s5-s10:

$$\Delta G_{\text{OH}^*} = (G_{\text{OH}^*}) - (G^* + G_{\text{OH}^-}) \quad (\text{Eq. s5})$$

$$\Delta G_{\text{O}^*} = (G_{\text{O}^*} + G_{\text{H}_2\text{O}(l)}) - (G^* + 2G_{\text{OH}^-}) \quad (\text{Eq. s6})$$

$$\Delta G_{\text{OOH}^*} = (G_{\text{OOH}^*} + G_{\text{H}_2\text{O}(l)}) - (G^* + 3G_{\text{OH}^-}) \quad (\text{Eq. s7})$$

$$\Delta G_{\text{OH}^*}(\text{U}) = \Delta G_{\text{OH}^*} - eU \quad (\text{Eq. s8})$$

$$\Delta G_{\text{O}^*}(\text{U}) = \Delta G_{\text{O}^*} - 2eU \quad (\text{Eq. s9})$$

$$\Delta G_{\text{OOH}^*}(\text{U}) = \Delta G_{\text{OOH}^*} - 3eU \quad (\text{Eq. s10})$$

**Table S1** A summary of OER performance of dual transition metals nitrides

| Electrocatalysts                         | Electrolyte | Overpotential                    | Tafel slope             | Reference |
|------------------------------------------|-------------|----------------------------------|-------------------------|-----------|
|                                          |             | @ 10 mA cm <sup>-2</sup><br>(mV) | (mV dec <sup>-1</sup> ) |           |
| TiN@Ni <sub>3</sub> N                    | 0.1 M KOH   | 350                              | 93.70                   | [S11]     |
| FeNi <sub>3</sub> N-NPs                  | 1.0 M KOH   | 280                              | 46.00                   | [S12]     |
| Ni <sub>3</sub> FeN                      | 1.0 M KOH   | 223                              | 40.00                   | [S13]     |
| FeNi <sub>3</sub> N/NF                   | 1.0 M KOH   | 202                              | 40.00                   | [S14]     |
| MNCC4                                    | 1.0 M KOH   | 290                              | 65.00                   | [S15]     |
| Co-FeN@MWCNT                             | 1.0 M KOH   | 290                              | 32.00                   | [S16]     |
| Ni <sub>3</sub> FeN-NP                   | 1.0 M KOH   | 241                              | 59.00                   | [S17]     |
| CoFe(3:1)-N                              | 1.0 M KOH   | 200                              | 42.44                   | [S18]     |
| Ni <sub>3</sub> FeN/r-GO                 | 1.0 M KOH   | 270                              | 54.00                   | [S19]     |
| Co <sub>0.5</sub> Fe <sub>0.85</sub> NSs | 1.0 M KOH   | 266                              | 30.00                   | [S20]     |

**Table S2** Solvation energy ( $E_{\text{solv}}$ ) of catalytic reaction intermediates,  $\eta/\text{vac}$  and  $\eta/\text{sol}$  for the OER reactions of FeCo-NG and FeNi-NG.

|                           |      | FeCo              | FeCo              | FeCo                | FeNi              | FeNi              | FeNi                |
|---------------------------|------|-------------------|-------------------|---------------------|-------------------|-------------------|---------------------|
|                           |      | -N <sub>PAG</sub> | -N <sub>P</sub> G | -N <sub>P</sub> G-O | -N <sub>PAG</sub> | -N <sub>P</sub> G | -N <sub>P</sub> G-O |
| $E_{\text{solv}}$<br>(eV) | OH*  | -0.04             | 0.06              | 0.17                | -0.05             | 0.03              | -0.16               |
|                           | O*   | -0.09             | 0.02              | -0.21               | -0.07             | 0.06              | -0.23               |
|                           | OOH* | -0.10             | -0.13             | -0.19               | -0.11             | -0.15             | -0.23               |
| $\eta/\text{vac}$ (eV)    |      | 0.42              | 1.41              | 0.98                | 0.65              | 1.49              | 0.91                |
| $\eta/\text{sol}$ (eV)    |      | 0.31              | 1.26              | 1.00                | 0.61              | 1.28              | 0.91                |

**Table S3** The amount electrons ( $|e|$ ) of N atoms and nearby C atoms in NG and CoNi-NG. The amount of electron changes ( $\Delta|e|$ ) of N atoms and nearby C atoms when CoNi atoms embedded in NG.

|             |          | <b>N<sub>PA</sub>G</b> | <b>CoNi-N<sub>PA</sub>G</b> | <b>N<sub>p</sub>G</b> | <b>CoNi-N<sub>p</sub>G</b> |
|-------------|----------|------------------------|-----------------------------|-----------------------|----------------------------|
| $ e $       | <b>N</b> | -5.56                  | -6.91                       | -6.69                 | -7.26                      |
|             | <b>C</b> | 5.43                   | 4.83                        | 6.99                  | 5.67                       |
| $\Delta e $ | <b>N</b> |                        | -1.35                       |                       | -0.57                      |
|             | <b>C</b> |                        | -0.60                       |                       | -1.32                      |

**Table S4** The oxidation states of Co/Ni atom of CoNi-NG catalysts.  $\Delta G$  values of CoNi-NG catalysts at  $U=0V$ .

|                                                |      | oxidation<br>state<br>of Co ( e ) | oxidation<br>state<br>of Ni ( e ) | $\Delta G @ U=0V$<br>(eV) |
|------------------------------------------------|------|-----------------------------------|-----------------------------------|---------------------------|
| <b>CoNi-N<sub>P</sub>A<sub>G</sub></b>         | *    | 0.93                              | 0.87                              | --                        |
|                                                | OH*  | 1.16                              | 0.86                              | 0.25                      |
|                                                | O*   | 1.21                              | 0.87                              | 0.55                      |
|                                                | OOH* | 1.11                              | 0.87                              | 0.71                      |
| <b>CoNi-N<sub>P</sub>A<sub>G</sub><br/>-OH</b> | *    | 1.16                              | 0.86                              | --                        |
|                                                | OH*  | 1.27                              | 0.87                              | 0.31                      |
|                                                | O*   | 1.32                              | 0.88                              | 0.85                      |
|                                                | OOH* | 1.27                              | 0.89                              | 0.62                      |
| <b>CoNi-N<sub>P</sub>A<sub>G</sub><br/>-O</b>  | *    | 1.21                              | 0.87                              | --                        |
|                                                | OH*  | 1.35                              | 0.87                              | 0.60                      |
|                                                | O*   | 1.31                              | 1.01                              | 1.21                      |
|                                                | OOH* | 1.31                              | 0.83                              | 0.25                      |
| <b>CoNi-N<sub>P</sub>G</b>                     | *    | 0.67                              | 0.56                              | --                        |
|                                                | OH*  | 0.92                              | 0.82                              | -0.30                     |
|                                                | O*   | 1.01                              | 0.91                              | -0.32                     |
|                                                | OOH* | 0.91                              | 0.81                              | 1.83                      |
| <b>CoNi-N<sub>P</sub>G<br/>-OH</b>             | *    | 0.92                              | 0.82                              | --                        |
|                                                | OH*  | 1.11                              | 0.83                              | -0.03                     |
|                                                | O*   | 1.20                              | 0.85                              | 0.54                      |
|                                                | OOH* | 1.10                              | 0.83                              | 0.83                      |
| <b>CoNi-N<sub>P</sub>G<br/>-O</b>              | *    | 1.01                              | 0.91                              | --                        |
|                                                | OH*  | 1.16                              | 0.91                              | 0.47                      |
|                                                | O*   | 1.23                              | 0.97                              | 0.64                      |
|                                                | OOH* | 1.14                              | 0.92                              | 0.78                      |

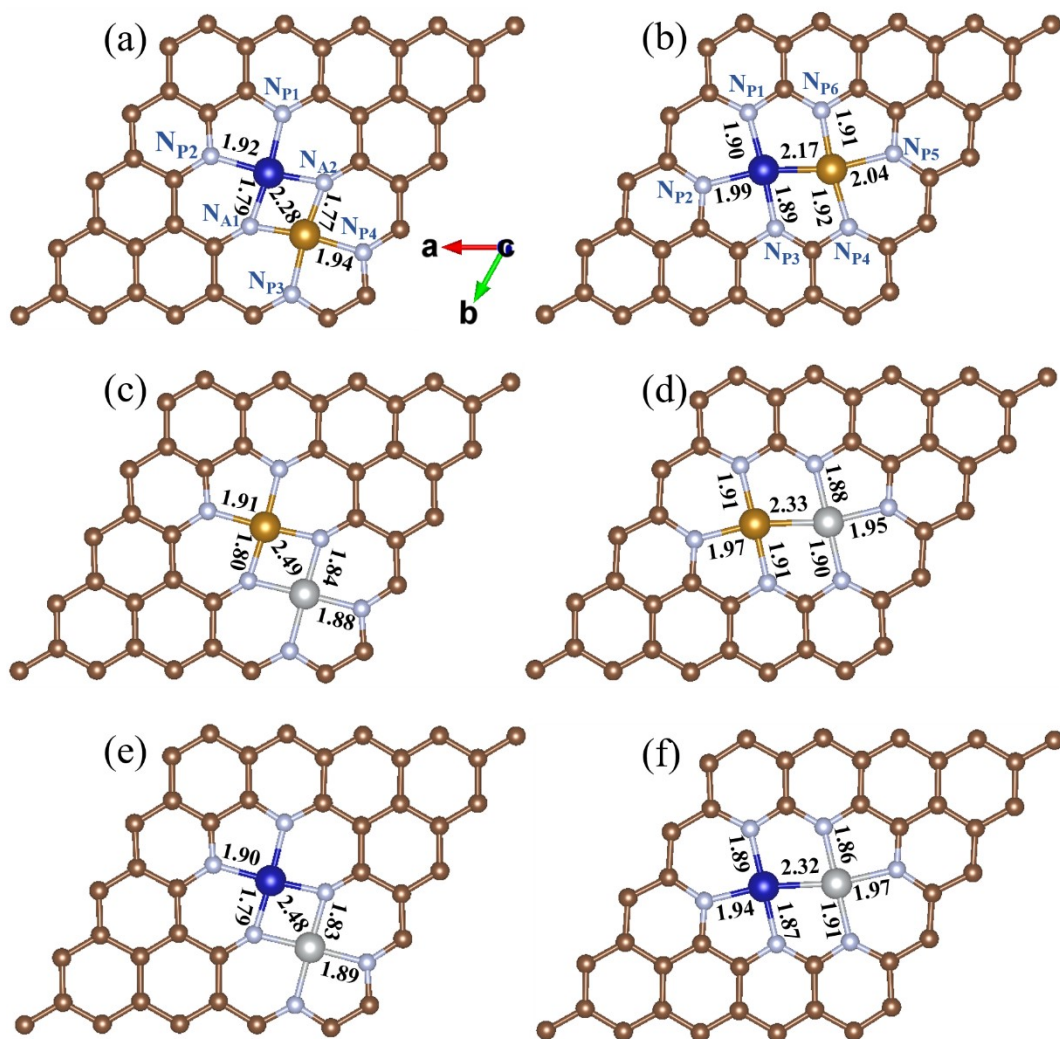

**Fig. S1** The geometric structures and the mainly bonds lengths (Å) of (a) FeCo-N<sub>PA</sub>G and (b) FeCo-N<sub>P</sub>G; (c) FeNi-N<sub>PA</sub>G and (d) FeNi-N<sub>P</sub>G; (e) CoNi-N<sub>PA</sub>G and (f) CoNi-N<sub>P</sub>G. The golden, dark grey and blue balls represent Fe, Co and Ni atom, respectively.

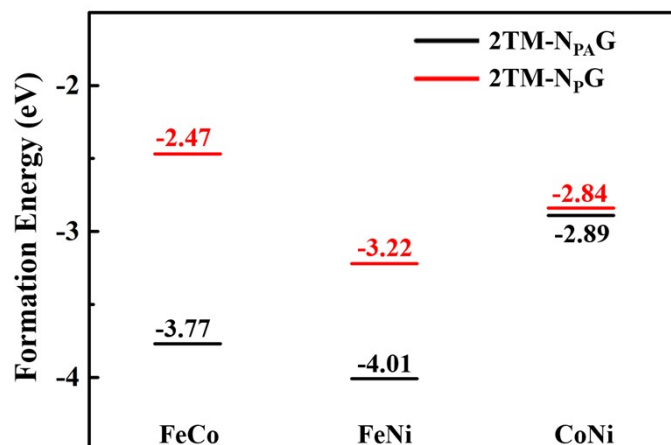

**Fig. S2** The formation energy for 2TM-N<sub>pA</sub>G and 2TM-N<sub>p</sub>G.

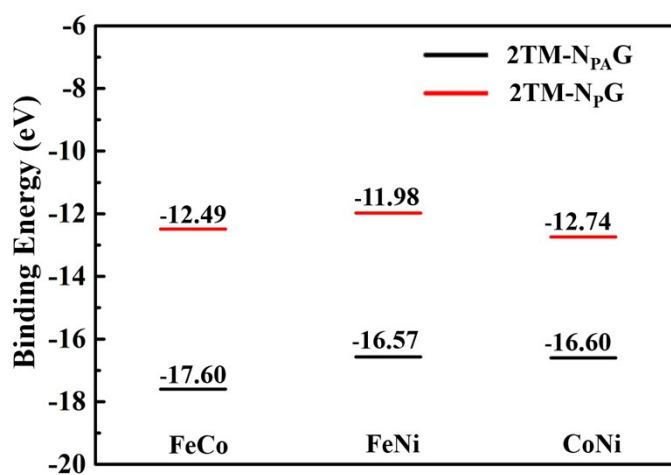

**Fig. S3** The binding energy for 2TM-N<sub>pA</sub>G and 2TM-N<sub>p</sub>G.



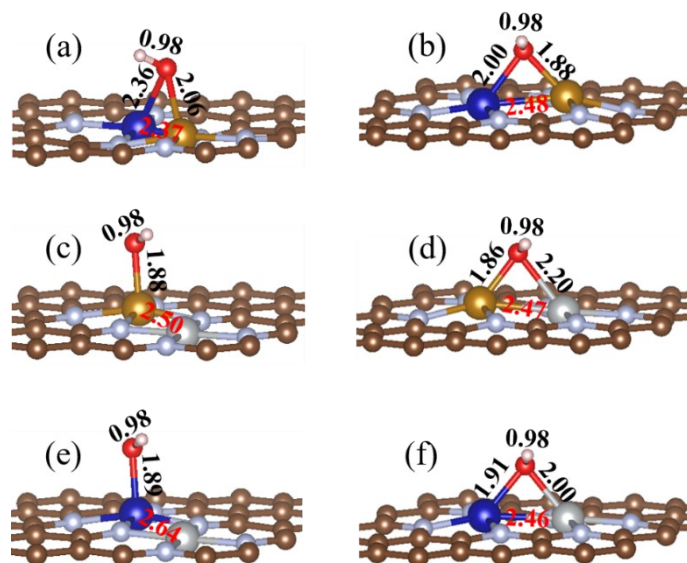

**Fig. S4** OH radical adsorption configurations for (a) FeCo- $N_{PA}G$ , (b) FeCo- $N_PG$ , (c) FeNi- $N_{PA}G$ , (d) FeNi- $N_PG$ , (e) CoNi- $N_{PA}G$  and (f) CoNi- $N_PG$ . The golden, dark grey and blue balls represent Fe, Co and Ni atoms, respectively.

For FeCo- $N_{PA}G$  and FeCo- $N_PG$  (Fig. S4 (a, b)), after adsorption of OH radical, the lengths of Fe-Co are 2.37 Å and 2.48 Å, respectively, and the lengths increased corresponding to that before adsorption. In addition, Fe-O and Co-O bonds with lengths of 2.06 Å, 2.36 Å (FeCo- $N_{PA}G$ ) and 1.88 Å, 2.00 Å (FeCo- $N_PG$ ) are formed. For FeNi- $N_PG$  and CoNi- $N_PG$  (Fig. S4 (d, f)), the adsorption configurations of OH radical are very similar to that of FeCo- $N_PG$ . After OH radical is adsorbed in FeNi- $N_{PA}G$  (Fig. S4 (c)), the length of Fe-Ni is 2.50 Å. However, OH radical is only adsorbed on Fe site, and the calculated bond length between the Fe and O atoms is 1.88 Å, which is smaller than the length of Fe-O (2.06 Å) in FeCo- $N_{PA}G$ . For CoNi- $N_{PA}G$  (Fig. S4 (e)), the Co-O bond length is 1.89 Å, and note that the bond length of Co-Ni is 2.64 Å, which is the longest TM1-TM2 bond length among these structures.

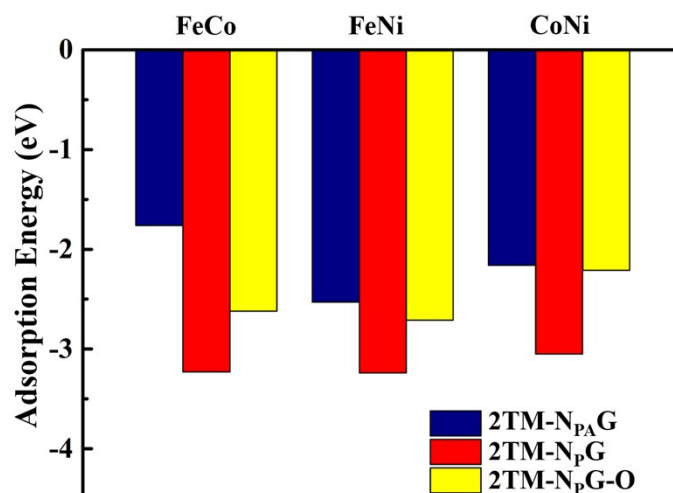

**Fig. S5** OH radical adsorption energy for 2TM-N<sub>p</sub>AG, 2TM-N<sub>p</sub>G and 2TM-N<sub>p</sub>G-O.

To better judge the relative stability of OH radical adsorption on the catalysts surface, the adsorption energy ( $E_{\text{ads}}$ ) is calculated as Eq. s11 [S1]:

$$E_{\text{ads}} = E_{\text{OH}^*} - E(2\text{TM-NG}) - E_{\text{OH}} \quad (\text{Eq. s11})$$

where  $E_{\text{OH}^*}$  is the total energy of OH\*,  $E(2\text{TM-NG})$  and  $E_{\text{OH}}$  are the energies of 2TM-NG and OH radical (-7.14 eV). Negative adsorption energy indicates the exothermic process after OH radical adsorption on the substrate. The larger the negative value, the stronger the binding between OH radical and 2TM-NG [S21]. The  $E_{\text{ads}}$  of OH radical adsorbed on 2TM-N<sub>p</sub>G (-3.23 eV for FeCo, -3.24 eV for FeNi, -3.05 eV for CoNi) are lower than that adsorbed on 2TM-N<sub>p</sub>AG (-1.76 eV for FeCo, -2.53 eV for FeNi, -2.16 eV for CoNi) (Fig. S5), indicating that 2TM-N<sub>p</sub>G has higher adsorption activity and stability for OH radical.

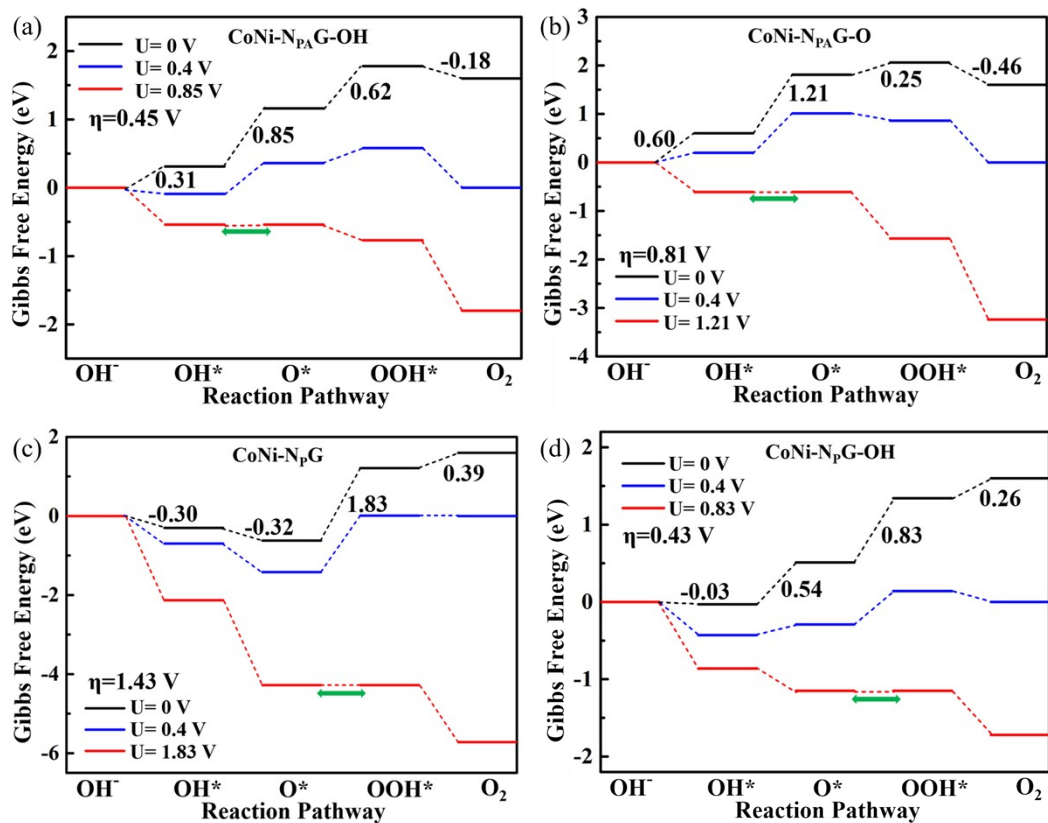

**Fig. S6** At pH=14, the Gibbs free energy for the OER pathway for (a) CoNi-N<sub>PA</sub>G-OH, (b) CoNi-N<sub>PA</sub>G-O, (c) CoNi-N<sub>P</sub>G and (d) CoNi-N<sub>P</sub>G-OH.

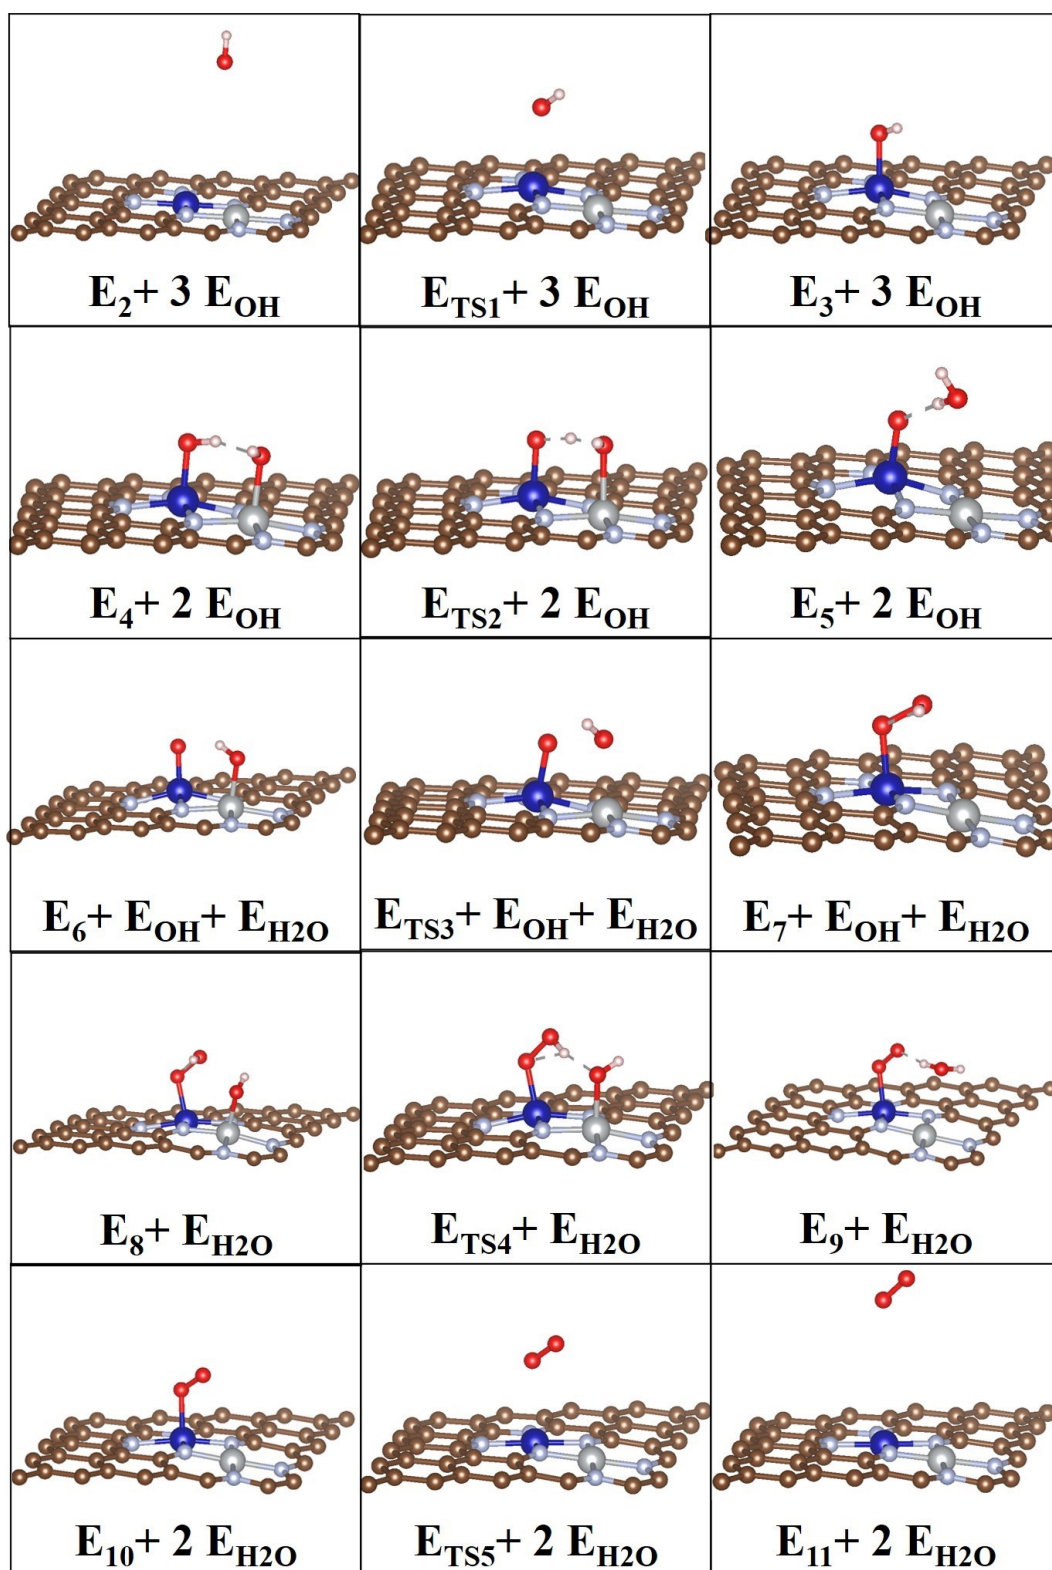

**Fig. S7** Structures and energies corresponds to dynamic reaction pathway of OER for CoNi-N<sub>PAG</sub>.

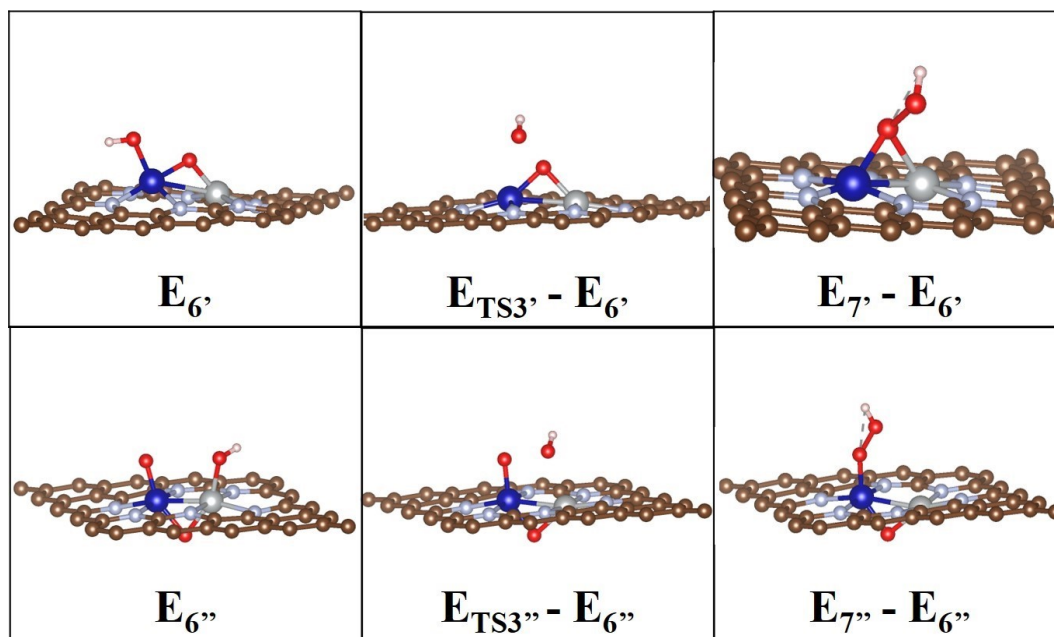

**Fig. S8** Structures and energies corresponds to rate-determining step of OER for CoNi-NpG (top) and CoNi-NpG-O (bottom).

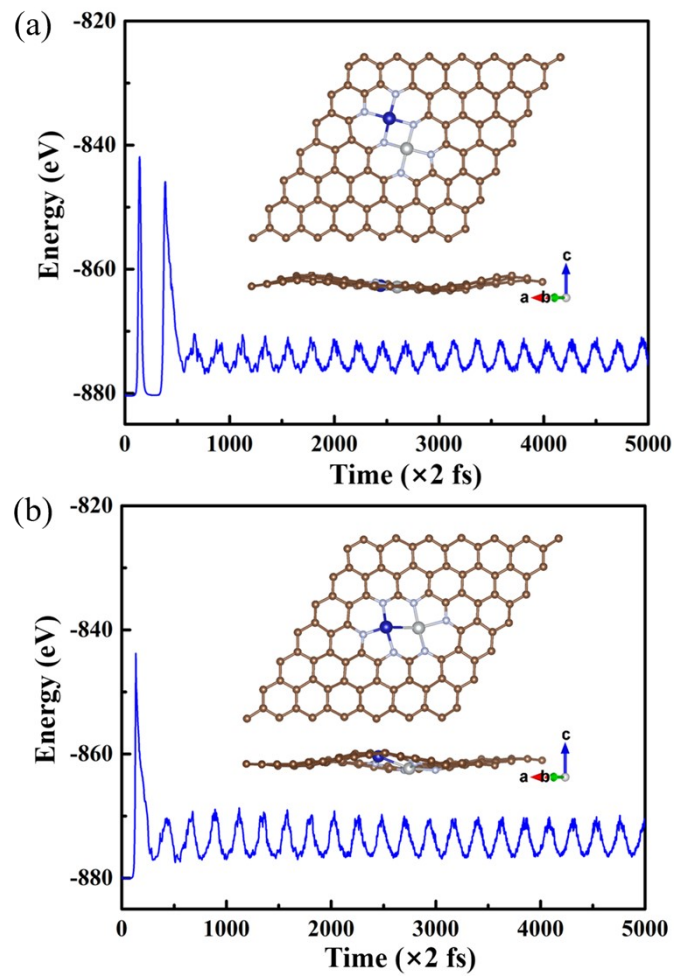

**Fig. S9** Energy fluctuation of (a) CoNi-N<sub>PA</sub>G, (b) CoNi-N<sub>P</sub>G during AIMD simulations at 500 K.

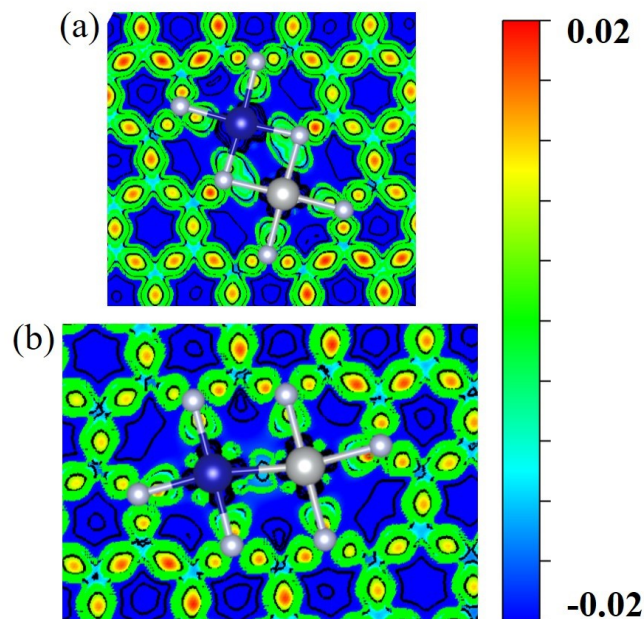

**Fig. S10** The 2D charge density differences (differences between an interacting system and the superposition of atomic charge densities) for (a) CoNi-N<sub>pA</sub>G and (b) CoNi-N<sub>pG</sub>. (The 2D charge density differences, which helps to visualize the characteristics of bonding, is defined as the differences between the CoNi-NG systems and the superposition of atomic charge densities, i.e.,  $\Delta\rho(r) = \rho(\text{CoNi-NG}) - \sum\rho(\text{atom})$ .)



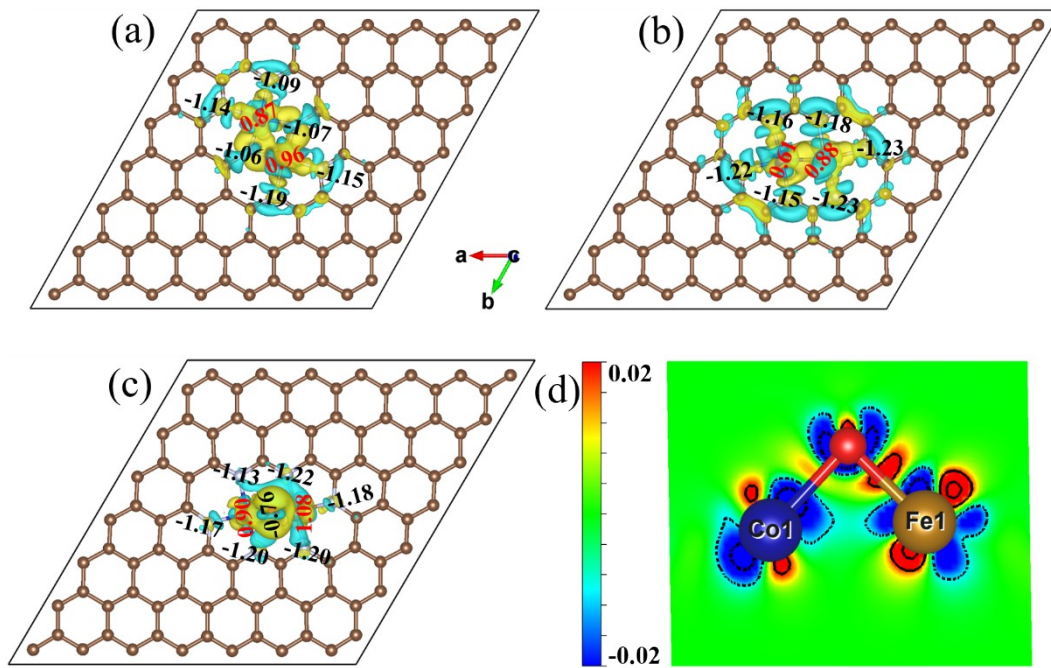

**Fig. S11** The Bader charge analysis and the 3D charge density differences for (a) FeCo-N<sub>p</sub>AG, (b) FeCo-N<sub>p</sub>G, and (c) FeCo-N<sub>p</sub>G-O. (d) The 2D plots clipping plane corresponding FeCo-N<sub>p</sub>G-O crosses the three atoms of Co, O and Fe. Yellow (solid contour line) and blue (dashed contour line) correspond to accumulation and depletion of total valence electrons, respectively. The isosurface value is 0.0035 e bohr<sup>-3</sup>.



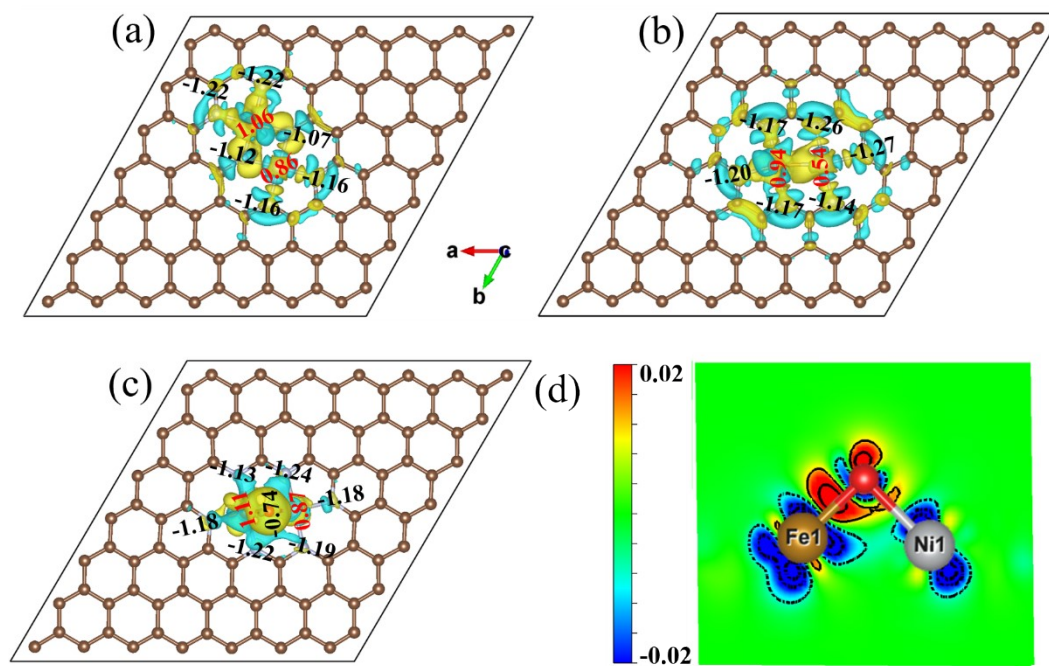

**Fig. S12** The Bader charge analysis and the 3D charge density differences for (a) FeNi-Np<sub>A</sub>G, (b) FeNi-NpG, and (c) FeNi-NpG-O. (d) The 2D plots clipping plane corresponding FeNi-NpG-O crosses the three atoms of Fe, O and Ni. Yellow (solid contour line) and blue (dashed contour line) correspond to accumulation and depletion of total valence electrons, respectively. The isosurface value is 0.0035 e bohr<sup>-3</sup>.

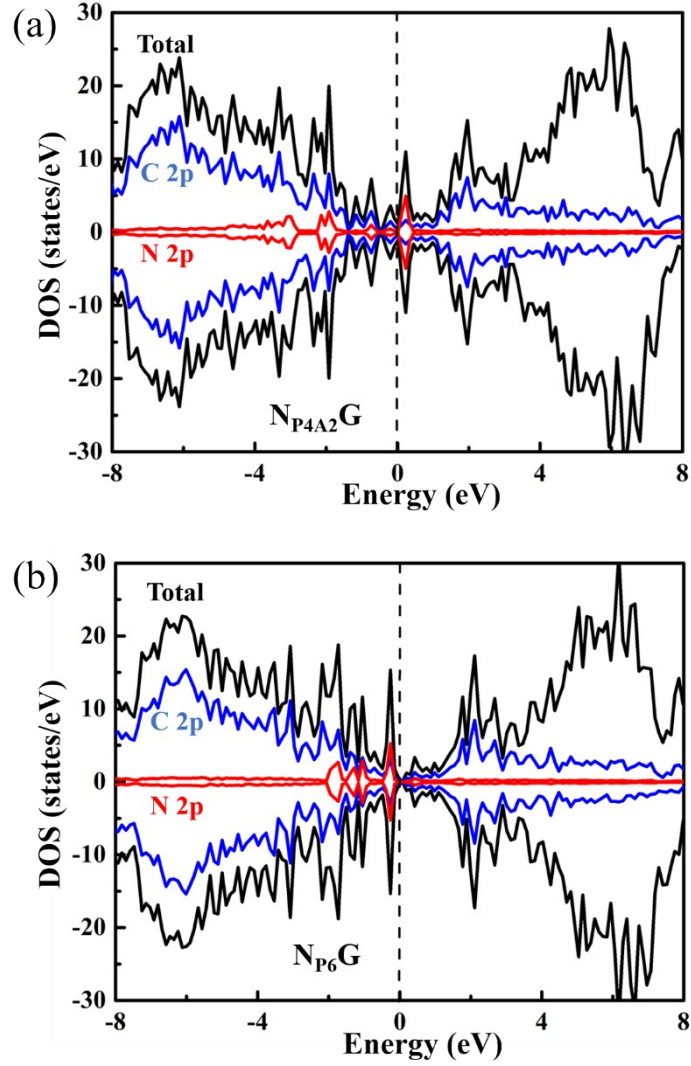

**Fig. S13** Spin-polarized density of states for (a)  $N_{PA}G$  and (b)  $N_PG$ .

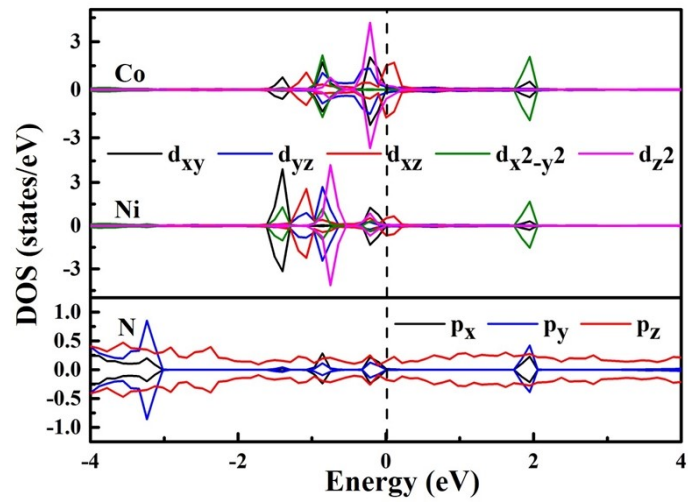

**Fig. S14** Density of states of Co/Ni 3d and N 2p split orbitals for  $CoNi-N_PG$ .

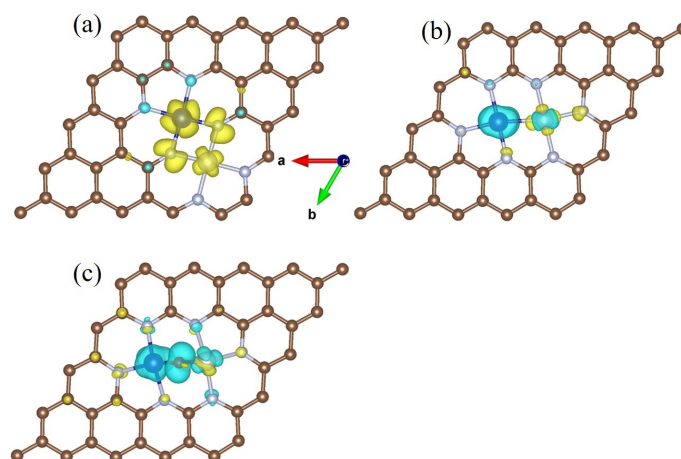

**Fig. S15** Spin charge density of (a) CoNi-N<sub>PA</sub>G, (b) CoNi-N<sub>p</sub>G and (c) CoNi-N<sub>p</sub>G-O.

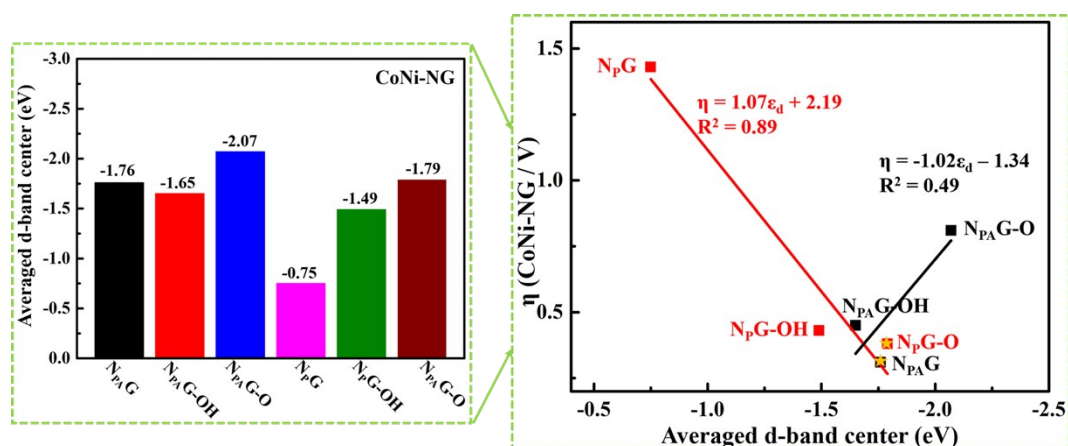

**Fig. S16** Corresponding values and the correlation between over-potential ( $\eta$ ) of CoNi-NG and the averaged d-band center ( $\epsilon_d$ ) for dual transition metal atoms (CoNi).

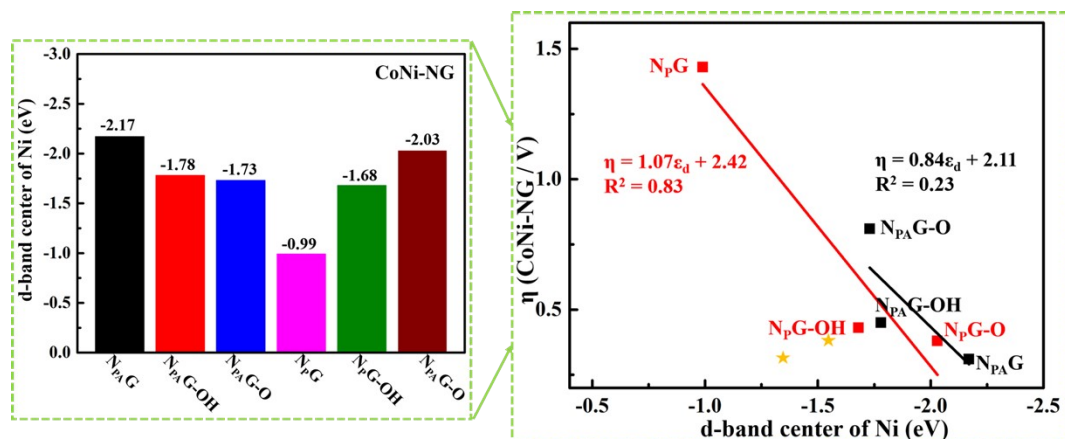

**Fig. S17** Corresponding values and the correlation between over-potential ( $\eta$ ) of CoNi-NG and d-band center ( $\epsilon_d$ ) of Ni atom.

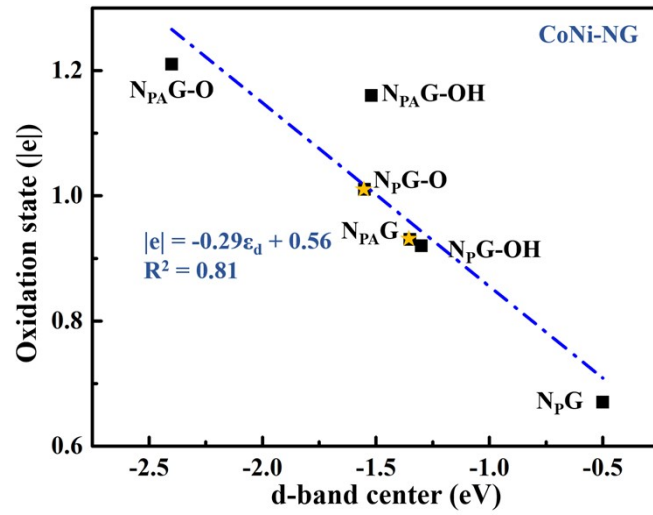

**Fig. S18** Correlation between the oxidation state and d-band center ( $\epsilon_d$ ) of Co atom in CoNi-NG.

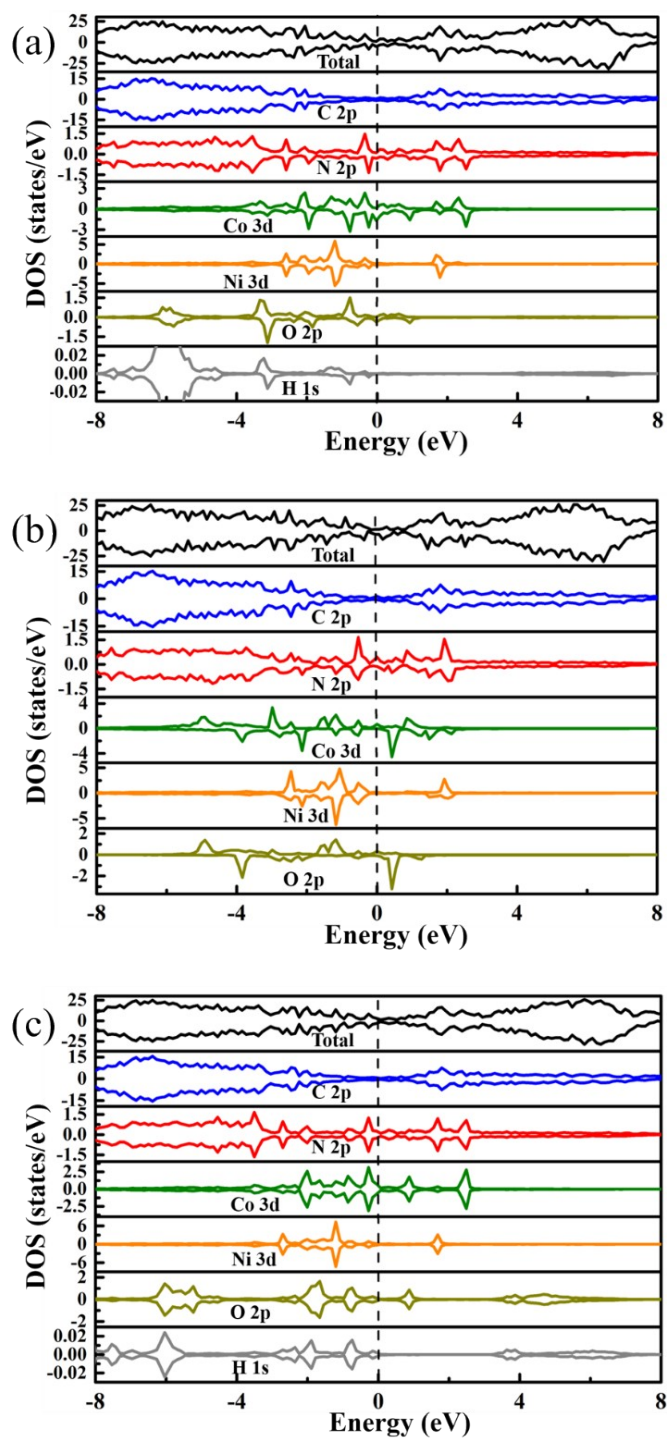

**Fig. S19** Spin-polarized density of states for adsorption intermediates (a) OH\*, (b) O\*, and (c) OOH\* on CoNi-N<sub>p</sub>AG.

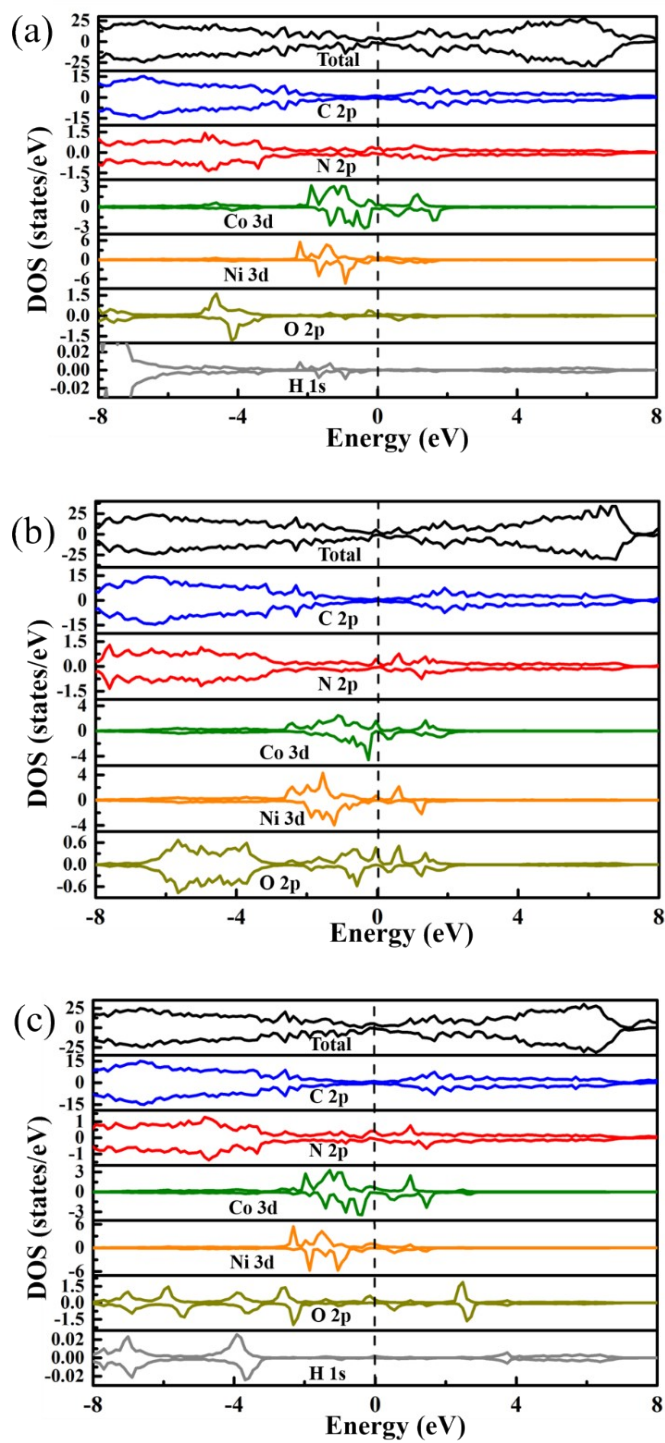

**Fig. S20** Spin-polarized density of states for adsorption intermediates (a) OH\*, (b) O\*, and (c) OOH\* on CoNi-NpG.



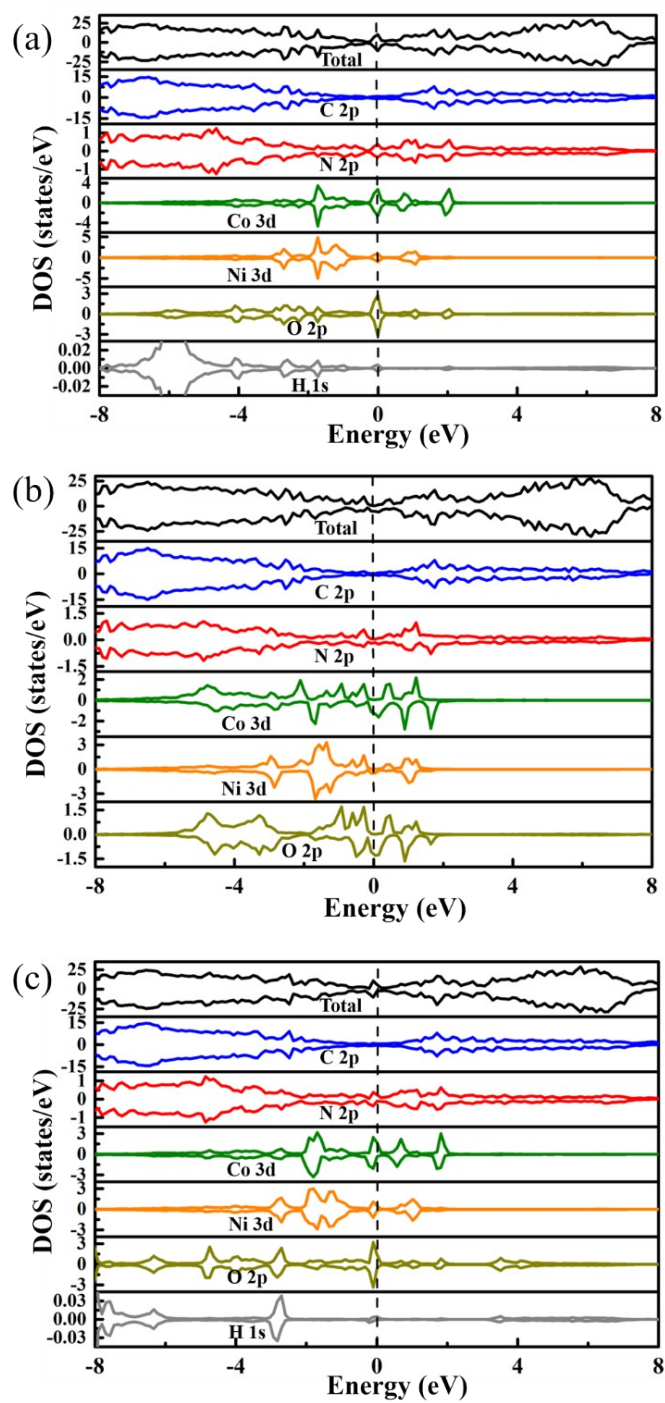

**Fig. S21** Spin-polarized density of states for adsorption intermediates (a) OH\*, (b) O\*, and (c) OOH\* on CoNi-NpG-O.

## References

- [S1] L. L. Liu, C. P. Chen, L. S. Zhao, Y. Wang and X. C. Wang, *Carbon*, 2017, **115**, 773-780.
- [S2] Y. S. Wei, L. Sun, M. Wang, J. Hong, L. Zou, H. Liu, Y. Wang, M. Zhang, Z. Liu and Y. Li, *Angew. Chem. Int. Edit.*, 2020, **132**, 16147-16156.
- [S3] L. Ismer, M. S. Park, A. Janotti and C. G. Van de Walle, *Phys. Rev. B*, 2009, **80**, 184110.
- [S4] C. G. Van de Walle and J. Neugebauer, *J. Appl. Phys.*, 2004, **95**, 3851-3879.
- [S5] E. Finazzi and C. Di Valentin, *J. Phys. Chem. C*, 2007, **111**, 9275-9282.
- [S6] S. Kattel, P. Atanassov and B. Kiefer, *Phys. Chem. Chem. Phys.*, 2014, **16**, 13800-13806.
- [S7] X. Zheng, Y. Yao, W. Ye, P. Gao and Y. Liu, *Chem. Eng. J.*, 2020, **413**, 128027.
- [S8] P. Nematollahi and E. C. Neyts, *Appl. Surf. Sci.*, 2019, **496**, 143618.
- [S9] C. Yang, Z. D. Yang, H. Dong, N. Sun, Y. Lu, F. M. Zhang and G. Zhang, *ACS Energy Lett.*, 2019, **4**, 2251-2258.
- [S10] H. X. Xu, D. J. Cheng, D. P. Cao and X. C. Zeng, *Nature Catal.*, 2018, **1**, 632-632.
- [S11] Q. Zhang, Y. Wang, Y. Wang, A. M. Al-Enizi, A. A. Elzatahry and G. Zheng, *J. Mater. Chem. A*, 2016, **4**, 5713-5718.
- [S12] X. Jia, Y. Zhao, G. Chen, L. Shang, R. Shi, X. Kang, G. I. Waterhouse, L. Z. Wu, C. H. Tung and T. Zhang, *Adv. Energy Mater.*, 2016, **6**, 1502585.
- [S13] Y. Wang, C. Xie, D. Liu, X. Huang, J. Huo and S. Wang, *ACS Appl. Mater.*



*Inter.*, 2016, **8**, 18652-18657.

[S14] B. Zhang, C. Xiao, S. Xie, J. Liang, X. Chen and Y. Tang, *Chem. Mater.*, 2016, **28**, 6934-6941.

[S15] Y. Wang, B. Zhang, W. Pan, H. Ma and J. Zhang, *ChemSusChem*, 2017, **10**, 4170-4177.

[S16] T. Gao, Z. Jin, Y. Zhang, G. Tan, H. Yuan and D. Xiao, *Electrochim. Acta*, 2017, **258**, 51-60.

[S17] N. T. Suen, S. F. Hung, Q. Quan, N. Zhang, Y. J. Xu and H. M. Chen, *Chem. Soc. Rev.*, 2017, **46**, 337-365.

[S18] T. Liu, M. Li, X. Bo and M. Zhou, *ACS Sustain. Chem. Eng.*, 2018, **6**, 11457-11465.

[S19] Y. Gu, S. Chen, J. Ren, Y. A. Jia, C. Chen, S. Komarneni, D. Yang and X. Yao, *ACS Nano*, 2018, **12**, 245-253.

[S20] L. An, J. Feng, Y. Zhang, Y.-Q. Zhao, R. Si, G.-C. Wang, F. Cheng, P. Xi and S. Sun, *Nano Energy*, 2019, **57**, 644-652.

[S21] M. Lei, Y. Zhang, M. Wang, W. Yang and Z. Gao, *Chem. Eng. J.*, 2021, **421**, 129747.
